# Supplementary material
Source: publisher figshare collection journal article supplement (https://frontiersin.figshare.com/ndownloader/files/23453681)
Supplement: Supplementary file 1 [file 23453681]

## Sheet: Title Page
Supplementary Materials for Stickler et al. 2020
Citation: Stickler, C., David, O., Chan, C., Ardila, J., Bezerra, T. (2020). "The Rio Branco Declaration: Assessing Progress Toward a Near-Term Voluntary Deforestation Reduction Target in Subnational Jurisdictions Across the Tropics." Frontiers in Forests and Global Change. doi: 10.3389/ffgc.2020.00050
Correspondence: cstickler@earthinnovation.org
Contents:
1. Title Page
2. Text S1: Forest cover, forest reference level, and deforestation data
3. Text S2: Progress toward achievement of targets
4. Text S3: NDC emissions reductions
5. Text S4: International climate and forest finance data and analysis
6. Table S1: Forest reference level criteria used for jurisdictional baselines in the study
7. Table S2: Percentage of each Brazilian state comprised of Amazon and Cerrado biomes and current forest area (as defined in Brazil’s NDC submission) remaining within each biome
8. Table S3: NDC emissions reductions
9. Table S4a. Database of international finance to 30 subnational government signatories to the Rio Branco Declaration from 2010-2018: Full finance inventory
10. Table S4b. Database of international finance to 30 subnational government signatories to the Rio Branco Declaration from 2010-2018: Sums; other calculations
11. Table S5. Database of annual deforestation in 30 subnational government signatories to the Rio Branco Declaration (1997-2018)
12. Figure S1: Annual deforestation by Rio Branco Declaration signatory jurisdiction in (A) Brazil (1997-2018), (B) Indonesia (1997-2017), (C) Mexico (1997-2015), and (D) Peru (2001-2018)

## Sheet: Text S1
Text S1: Forest cover, forest reference level, and deforestation data sources
The concepts of forest and deforestation used in the study are based on the physical definition adopted by each country in its forest reference emission level (FREL) and on the functional implementation adopted by each national forest monitoring system. Forest area and yearly deforestation are reported directly for the subnational level by official national forest monitoring systems as follows: ●…

## Sheet: Text S2
Text S2: Estimating progress toward achievement of targets
We computed the progress towards a given pledge as the difference between the current deforestation level against the deforestation baseline defined explicitly by the pledge. For Rio Branco, we used the FREL baseline defined at the moment of the Rio Branco signature by the country of each jurisdiction as the business as usual baseline (“Baseline RBD”, Table S1). These baselines are defined as par…

## Sheet: Text S3
Text S3: Estimating jurisdictional contributions to NDC emissions reductions
For each jurisdiction, we calculated the projected emissions reduction (in terms of CO2e) of jurisdictional deforestation reduction targets as a contribution to its respective country’s targeted NDC emissions reductions. (NDC emissions reduction targets are set for the combination of sectors across the economy and do not define specific emission reductions goals associated only with deforestation…

## Sheet: Text S4
Text S4: International climate and forest finance data and analysis
We chose 2010 as the starting year for this analysis because of its relevance as the year following the 2009 COP15 negotiations in Copenhagen, at which wealthier nations agreed to provide USD 30 billion in additional climate finance from 2010-2012 and to mobilize USD 100 billion per year by 2020 (UNFCCC 2009). Simultaneously, the negotiations marked a shift in interest beyond national state actor…
References
Clapp, C., Ellis, J., Benn, J., Corfee-Morlot, J. “Tracking Climate Finance: What and How?” OECD Climate Change Expert Group Paper No. 2012(1). www.oecd.org/env/cc/ccxg.htm.
CPI, 2019. Global Landscape of Climate Finance 2019 [Barbara Buchner, Alex Clark, Angela Falconer, Rob Macquarie, Chavi Meattle, Rowena Tolentino, Cooper Wetherbee]. Climate Policy Initiative, London. Available at: https://climatepolicyinitiative.org/publication/global-climate-finance-2019/.
Norman, M. and Nakhooda, S. 2014. “The State of REDD+ Finance.” CGD Working Paper 378. Washington, DC: Center for Global Development. http://www.cgdev.org/publication/state-redd-finance-working-paper-378
UNFCCC, 2009. Report of the Conference of the Parties on its fifteenth session, held in Copenhagen from 7 to 19 December 2009. https://unfccc.int/resource/docs/2009/cop15/eng/11a01.pdf.
van der Hoff, R., Rajão, R. and Leroy, P., 2018. Clashing interpretations of REDD+ “results” in the Amazon Fund. Climatic Change, 150(3-4), pp.433-445.
Weikmans, R. and Roberts, J.T., 2019. The international climate finance accounting muddle: is there hope on the horizon?. Climate and Development, 11(2), pp.97-111.

## Sheet: Table S1
Table S1. Reference period used to establish RBD target baseline, and period used to calculate current deforestation area value, by country.
	(a) Baseline RBD		(b) Current deforestation period1
Country	from	to	from	to
Brazil	1996	2010	2016	2018
Mexico	2000	2010	2013	2015
Indonesia	1990	2012	2015	2017
Peru	2001	2014	2016	2018
1 Most recent 3 years of annual deforestation area values used to calculate weighted average to represent current deforestation

## Sheet: Table S2
Table S2. Percentage of each Brazilian state comprised of Amazon and Cerrado biomes and current forest area (as defined in Brazil’s NDC submission) remaining within each biome. Other biomes are excluded from our analyses since they do not comprise a significant portion of any state’s area.
Jurisdiction	Amazon		Cerrado
	Biome as % of jurisdiction	Current forest area as % of jurisdiction	Biome as % of jurisdiction	Current forest area as % of jurisdiction
AC	1	0.87	0	NA
AP	1	0.77	0	NA
AM	1	0.91	0	NA
MA	0.34	0.13	0.65	0.41
MT	0.54	0.35	0.4	0.21
PA	1	0.7	0	0
RO	1	0.52	0	0
RR	1	0.67	0	NA
TO	0.09	0.04	0.91	0.62

## Sheet: Table S3
Table S3. Parameters used for reported NDC emissions reductions estimations.
Country	Baseline Reference Year	National Baseline (all sectors)	NDC Goal 2030	NDC Goal 2030
		(MtCO2e y-1)	(% emissions reduction)	(MtCO2e y-1 emissions reduction )
Brazil	2005	2738	37	1177
Mexico	2013	665	36	214
Indonesia	2010	1334	41	832
Peru	2010	171	20	60

## Sheet: Table S4a
Table S4a. Database of international finance to 30 subnational government signatories to the Rio Branco Declaration from 2010-2018: Full finance inventory. All links accessed March 24, 2020.
Authors: Olivia David, Tathiana Bezerra, Claudia Stickler
		Amount	Value in original currency (x conversion rate used)	Source	Source type	Year pledged	Pledged before/after 2015 ("A" includes 2015)	"Jurisdictional" Y/N	Notes	Reference
BRAZIL	Acre	388250	N/A	UNDP-Norway	Bilateral	2018	A	Y	Project to support jurisdictional strategy & investment plan	https://www.gcftf.org/gcf-jurisdictional-strategy-updates
		20576384	EUR 16,000,000 (x 1.286024)	BMZ (Germany)	Bilateral	2012	B	Y	REDD Early Movers (REM) Program: results-based finance for reduced deforestation	https://www.kfw-entwicklungsbank.de/PDF/Entwicklungsfinanzierung/Themen-NEU/REDD-Early-Movers-Acre-Fact-Sheet.pdf
		11953557	EUR 9,000,000 (x 1.328173)	BMUB (Germany)	Bilateral	2013	B	Y	REM	https://www.kfw-entwicklungsbank.de/PDF/Entwicklungsfinanzierung/Themen-NEU/REDD-Early-Movers-Acre-Fact-Sheet.pdf
		11294690	EUR 10,000,000 (x 1.129469)	Germany	Bilateral	2017	A	Y	REM	https://www.kfw-entwicklungsbank.de/International-financing/KfW-Development-Bank/Topics/Climate/REDD/
		2.29831e+07	GBP 17,840,000 (x 1.288289)	UK	Bilateral	2017	A	Y	REM	https://www.kfw-entwicklungsbank.de/International-financing/KfW-Development-Bank/Topics/Climate/REDD/
		7.70759e+06	R$ 16,838,000	Amazon Fund	Multilateral	2013	B	N	CAR implementation	http://www.amazonfund.gov.br/en/projeto/CAR-Acre/
		889760	R$ 3,106,064	Amazon Fund	Multilateral	2015	A	N	Sustainable production in indigenous lands	http://www.amazonfund.gov.br/en/projeto/Value-Chains-in-Indigenous-Lands-in-Acre/
		6.89262e+06	R$ 13,280,709.56	Amazon Fund	Multilateral	2012	B	Y	Monitoring, preventing and combating deforestation caused by forest fires and unauthorized burning	http://www.amazonfund.gov.br/en/projeto/The-State-of-Acre-Zero-Forest-Fires/
		1.7963e+06	R$ 5,823,061	Amazon Fund	Multilateral	2018	A	N	Indigenous territorial & environmental management	http://www.amazonfund.gov.br/en/projeto/Indigenous-Experiences-of-Territorial-and-Environmental-Management-in-Acre/
		2.12893e+06	R$ 5,081,763	Amazon Fund	Multilateral	2014	B	N	Cooperacre: strengthening forest-based economies	http://www.amazonfund.gov.br/en/projeto/Strengthening-the-Forest-Based-Sustainable-Economy/
		3.3512e+07	R$ 57,057,461	Amazon Fund	Multilateral	2010	B	N	Integrated environmental management	http://www.amazonfund.gov.br/en/projeto/Importance-of-Forest-Environmental-Assets/
		72000000	N/A	IDB	Multilateral	2013	B	Y	PDSA-II (loan)	https://www.iadb.org/en/news/news-releases/2013-04-22/sustainable-forestry-in-brazils-acre%2C10425.html
	Acre total	1.92123e+08	N/A	N/A	N/A	N/A	N/A	N/A	N/A	N/A
	Amapá	2500000	N/A	Conservation International	NGO	2016	A	Y	Amapá Fund - maintaining biodiversity-protection areas	https://www.funbio.org.br/en/programas_e_projetos/amapa-fund/
		398401	N/A	UNDP-Norway	Bilateral	2018	A	Y	Project to support jurisdictional strategy & investment plan	https://www.gcftf.org/gcf-jurisdictional-strategy-updates
		608295	R$ 1,452,000	Amazon Fund	Multilateral	2014	B	Y	Strengthen protected areas	http://www.amazonfund.gov.br/en/projeto/Training-to-Conserve/
	Amapá total	3.5067e+06	N/A	N/A	N/A	N/A	N/A	N/A	N/A	N/A
	Amazonas	1.02047e+07	R$ 17,575,286.19	Amazon Fund	Multilateral	2010	B	Y	Reforestation, CAR implementation, silvopastoral/agroforestry systems	http://www.amazonfund.gov.br/en/projeto/Reforestation-in-the-southern-part-of-Amazonas-State/
		372425	N/A	UNDP-Norway	Bilateral	2018	A	Y	Project to support jurisdictional strategy & investment plan	https://www.gcftf.org/gcf-jurisdictional-strategy-updates
		1.10801e+07	R$ 19,107,547.89	Amazon Fund	Multilateral	2010	B	Y	Sustainable Amazon Foundation - Forest Assistance Program	http://www.amazonfund.gov.br/en/projeto/Forest-Assistance-Program/
		3.64231e+06	R$ 12,092,485	Amazon Fund	Multilateral	2018	A	N	Community forest management	http://www.amazonfund.gov.br/en/projeto/Forest-Cities/
		7.45966e+06	R$ 29,867,722	Amazon Fund	Multilateral	2019	A	N	CAR implementation	http://www.amazonfund.gov.br/en/projeto/CAR-Amazonas/
		3.59891e+06	R$ 11,448,505	Amazon Fund	Multilateral	2016	A	N	Indigenous territorial management	http://www.amazonfund.gov.br/en/projeto/Indigenous-Territorial-Management-in-the-South-of-Amazonas-State/
		2.51163e+06	R$ 6,364,730	Amazon Fund	Multilateral	2015	A	N	Strengthening indigenous & extractionist associations	http://www.amazonfund.gov.br/en/projeto/Arapaima-Production-Networks/
		8786621	R$ 31,518,490	Amazon Fund	Multilateral	2016	A	N	Continue & expand Bolsa Floresta program	http://www.amazonfund.gov.br/en/projeto/Forest-Assistance-Program-/
	Amazonas total	4.76563e+07	N/A	N/A	N/A	N/A	N/A	N/A	N/A	N/A
	Maranhão	400000	N/A	UNDP-Norway	Bilateral	2018	A	Y	Project to support jurisdictional strategy & investment plan	https://www.gcftf.org/gcf-jurisdictional-strategy-updates
		1.21916e+07	R$ 41,212,345	Amazon Fund	Multilateral	2018	A	N	CAR implementation	http://www.amazonfund.gov.br/en/projeto/More-sustainability-in-the-field/
		2.36375e+06	R$ 5,286,300	Amazon Fund	Multilateral	2014	B	N	Conservation & sustainable management of babaçu palm	http://www.amazonfund.gov.br/en/projeto/Babacu-Plantations-LPS/
	Maranhão total	1.49553e+07	N/A	N/A	N/A	N/A	N/A	N/A	N/A	N/A
	Mato Grosso	7470856	R$ 12,518,230.09	Amazon Fund	Multilateral	2012	B	N	Monitoring, preventing and combating deforestation caused by forest fires and unauthorized burning	http://www.amazonfund.gov.br/en/projeto/Forest-Firefighters-of-Mato-Grosso/
		14932820	R$ 35,015,970	Amazon Fund	Multilateral	2014	B	N	Consolidate Conservation Units, strengthen environmental licensing, decentralize environmental management	http://www.amazonfund.gov.br/en/projeto/Sustainable-Mato-Grosso/
		21932727	R$ 72,900,000	Amazon Fund	Multilateral	2018	A	Y	Land regularization	http://www.amazonfund.gov.br/en/projeto/Land-Regularization/
		3.16919e+07	GBP 24,600,000 (x 1.288289)	BEIS (UK)	Bilateral	2017	A	Y	REM	https://aidstream.org/files/documents/REM-Business-Case-Extension-20180322030336.pdf
		19200973	EUR 17,000,000 (x 1.129469)	KfW (Germany)	Bilateral	2017	A	Y	REM	https://www.kfw-entwicklungsbank.de/ipfz/Projektdatenbank%20/Redd-Early-Movers-Rem-Mato-Grosso-39425.htm https://www.icv.org.br/2017/11/13/mato-grossos-homework-still-due-for-cop23/
		399488	N/A	UNDP-Norway	Bilateral	2018	A	Y	Project to support jurisdictional strategy & investment plan	https://www.gcftf.org/gcf-jurisdictional-strategy-updates
	Mato Grosso total	9.56288e+07	N/A	N/A	N/A	N/A	N/A	N/A	N/A	N/A
	Pará	400000	N/A	UNDP-Norway	Bilateral	2018	A	Y	Project to support jurisdictional strategy & investment plan	https://www.gcftf.org/gcf-jurisdictional-strategy-updates
		9.02064e+06	R$15,923,230	Amazon Fund	Multilateral	2010	B	Y	CAR implementation	http://www.amazonfund.gov.br/en/projeto/Semas-Para/
		7.4387e+06	R$ 23,679,628	Amazon Fund	Multilateral	2017	A	N	Sustainable Tapájos: community-based forest production	http://www.amazonfund.gov.br/en/projeto/Sustainable-Tapajos/
		3.24205e+07	R$ 75,296,569.12	Amazon Fund	Multilateral	2014	B	N	Green Municipalities Program	http://www.amazonfund.gov.br/en/projeto/Green-Municipalities-Program/
	Pará total	4.92798e+07	N/A	N/A	N/A	N/A	N/A	N/A	N/A	N/A
	Rondônia	365109	N/A	UNDP-Norway	Bilateral	2018	A	Y	Project to support jurisdictional strategy & investment plan	https://www.gcftf.org/gcf-jurisdictional-strategy-updates
		7.43071e+06	R$ 15,040,500	Amazon Fund	Multilateral	2012	B	N	Monitoring, preventing and combating deforestation caused by forest fires and unauthorized burning	http://www.amazonfund.gov.br/en/projeto/Greener-Rondonia/
		4.03246e+06	R$ 9,117,000	Amazon Fund	Multilateral	2013	B	N	CAR registration, foresty recovery	http://www.amazonfund.gov.br/en/projeto/Amazon-Backyards/
		7.62622e+06	R$ 25,305,337	Amazon Fund	Multilateral	2018	A	N	Projects for the Recovery of Degraded and/or Changed Areas	http://www.amazonfund.gov.br/en/projeto/Sowing-Rondonia/
		1.33822e+07	R$ 31,227,392.40	Amazon Fund	Multilateral	2014	B	Y	Integrated Environmental Socioeconomic Development Project (PDESEAI)	http://www.amazonfund.gov.br/en/projeto/Integrated-Environmental-Socioeconomic-Development-Project-PDSEAI/
		2.34856e+06	R$ 8,700,000	Amazon Fund	Multilateral	2018	A	N	Support productive activities in indigenous lands	http://www.amazonfund.gov.br/en/projeto/Pact-for-the-Forest/
	Rondônia total	3.51853e+07	N/A	N/A	N/A	N/A	N/A	N/A	N/A	N/A
	Roraima	400000	N/A	UNDP-Norway	Bilateral	2018	A	Y	Project to support jurisdictional strategy & investment plan	https://www.gcftf.org/gcf-jurisdictional-strategy-updates
		1.23806e+06	R$ 3,075,205.25	Amazon Fund	Multilateral	2016	A	Y	CAR implementation	http://www.amazonfund.gov.br/en/projeto/CAR-Roraima/
	Roraima total	1.63806e+06	N/A	N/A	N/A	N/A	N/A	N/A	N/A	N/A
	Tocantins	372120	N/A	UNDP-Norway	Bilateral	2018	A	Y	Project to support jurisdictional strategy & investment plan	https://www.gcftf.org/gcf-jurisdictional-strategy-updates
		1.31805e+07	R$ 26,800,000	Amazon Fund	Multilateral	2013	B	Y	CAR implementation	http://www.amazonfund.gov.br/en/projeto/CAR-Lawful-Tocantins/
		2.75588e+06	R$ 4,958,910	Amazon Fund	Multilateral	2012	B	N	Monitoring, preventing and combating deforestation caused by forest fires and unauthorized burning	http://www.amazonfund.gov.br/en/projeto/Forest-Protection-in-the-State-of-Tocantins/
	Tocantins total	1.63085e+07	N/A	N/A	N/A	N/A	N/A	N/A	N/A	N/A
	Subtotal: Individual jurisdictions	4.56282e+08	N/A	N/A	N/A	N/A	N/A	N/A	N/A	N/A
	Brazil other	60330000	N/A	GEF Trust Fund	Multilateral	2016	A	N/A	Amazon Sustainable Landscapes Project	https://www.thegef.org/project/amazon-sustainable-landscapes-project
		8353968	EUR 6,000,000 (x 1.392328)	KfW (Germany)	Bilateral	2011	B	N/A	Preventing, controlling and monitoring fires in the Cerrado. Majority of priority areas are in TO, but funding is to national MMA.	https://www.international-climate-initiative.com/en/nc/details/project/prevention-control-and-monitoring-of-fires-in-the-brazilian-cerrado-11_III_036-528/
		9.03309e+06	EUR 6,487,761.32 (x 1.392328)	GIZ (Germany)	Bilateral	2011	B	N/A	Joint project w/ above	https://www.international-climate-initiative.com/en/nc/details/project/prevention-control-and-monitoring-of-fires-in-the-brazilian-cerrado-11_III_036-2762/
	Brazil other total	7.77171e+07	N/A	N/A	N/A	N/A	N/A	N/A	N/A	N/A
	BRAZIL TOTAL	5.33999e+08
INDONESIA	Aceh	399962	N/A	UNDP-Norway	Bilateral	2018	A	Y	Project to support jurisdictional strategy & investment plan	https://www.gcftf.org/gcf-jurisdictional-strategy-updates
		7.19099e+06	EUR 6,498,000 (x 1.106646)	EU	Bilateral	2016	A	N	Funding is to BAPPENAS (national level) - project focus on Aceh's contribution to National REDD+ Strategy	https://www.aht-group.com/cms/index.php?id=142
	Aceh total	7.59095e+06	N/A	N/A	N/A	N/A	N/A	N/A	N/A	N/A
	Central Kalimantan	319313	N/A	UNDP-Norway	Bilateral	2018	A	Y	Project to support jurisdictional strategy & investment plan	https://www.gcftf.org/gcf-jurisdictional-strategy-updates
		2023170	NOK 17,000,000 (x 0.119010)	NICFI (Norway)	Bilateral	2016	A	Y	PALM Project - production-protection approach for landscape management	https://norad.no/en/front/funding/climate-and-forest-initiative-support-scheme/grants-2013-2015/projects/developing-a-business-model-for-agricultural-and-forestry-practices/
	Central Kalimantan total	2342483	N/A	N/A	N/A	N/A	N/A	N/A	N/A	N/A
	East Kalimantan	325000	N/A	UNDP-Norway	Bilateral	2018	A	Y	Project to support jurisdictional strategy & investment plan	https://www.gcftf.org/gcf-jurisdictional-strategy-updates
		90700000	N/A	FCPF	Multilateral	2020	A	Y	EK Jurisdictional LED-R Program	https://www.forestcarbonpartnership.org/system/files/documents/Revised%20ERPD.pdf
	East Kalimantan total	91025000	N/A	N/A	N/A	N/A	N/A	N/A	N/A	N/A
	North Kalimantan	299841	N/A	UNDP-Norway	Bilateral	2018	A	Y	Project to support jurisdictional strategy & investment plan	https://www.gcftf.org/gcf-jurisdictional-strategy-updates
	North Kalimantan total	299841	N/A	N/A	N/A	N/A	N/A	N/A	N/A	N/A
	Papua	350000	N/A	UNDP-Norway	Bilateral	2018	A	Y	Project to support jurisdictional strategy & investment plan	https://www.gcftf.org/gcf-jurisdictional-strategy-updates
	Papua total	350000	N/A	N/A	N/A	N/A	N/A	N/A	N/A	N/A
	West Kalimantan	399786	N/A	UNDP-Norway	Bilateral	2018	A	Y	Project to support jurisdictional strategy & investment plan	https://www.gcftf.org/gcf-jurisdictional-strategy-updates
	West Kalimantan total	399786	N/A	N/A	N/A	N/A	N/A	N/A	N/A	N/A
	West Papua	337219	N/A	UNDP-Norway	Bilateral	2018	A	Y	Project to support jurisdictional strategy & investment plan	https://www.gcftf.org/gcf-jurisdictional-strategy-updates
	West Papua total	337219	N/A	N/A	N/A	N/A	N/A	N/A	N/A	N/A
	Subtotal: Individual jurisdictions	1.02345e+08	N/A	N/A	N/A	N/A	N/A	N/A	N/A	N/A
	Indonesia other	1000000000	N/A	Norway	Bilateral	2010	B	N/A	LOI Norway-Indonesia: Cooperation on reducing GHG from deforestation and forest degradation; includes support for province-level REDD+ pilots	https://www.regjeringen.no/contentassets/78ef00f5b01148e2973dca203463caee/letter-of-intent-indonesia-norway.pdf
		50000000	N/A	FCPF Carbon Fund	Multilateral	2018	A	N/A	Subnational pledges to Jambi, C Kal, E Kal, Sulawesi	https://www.forest-trends.org/wp-content/uploads/2016/08/doc_5334.pdf
		70000000	N/A	CIF - FIP	Multilateral	2012	B	N/A	Non-FCPF investment received for implementation of ER programs	https://www.climateinvestmentfunds.org/sites/cif_enc/files/fip_6_indonesia_0_0.pdf
		225000	N/A	FIP preparation grant	Multilateral	2011	B	N/A	Non-FCPF investment received for implementation of ER programs	https://www.climateinvestmentfunds.org/sites/cif_enc/files/FIP%20Indonesia_Preparation%20Grant%20Request_revised%20%28clean%29.pdf
		6330000	N/A	FIP DGM - IBRD	Multilateral	2016	A	N/A	Non-FCPF investment received for implementation of ER programs	https://www.dgmglobal.org/indonesia ; https://static1.squarespace.com/static/550abd2ce4b0c5557aa4f772/t/5bb67027f9619a3b77036cc9/1538682920276/DGM-Indonesia_PAD.pdf
		1.12883e+07	EUR 8,499,414 (x 1.328127)	KfW (Germany)	Bilateral	2013	B	N/A	Sustainable management of Leuser ecosystem	https://www.international-climate-initiative.com/en/details/project/climate-change-mitigation-and-species-conservation-in-the-leuser-ecosystem-of-sumatra-380/?b=2%2C0%2C0%2C0%2C0%2C1
		40890000	N/A	IFAD - ASAP program	Multilateral	2017	A	N/A	Rural Empowerment & Agriculture Development Scaling-up Initiative . Of this total, $1,000,000 is a grant, while the remainder is a loan.	https://www.ifad.org/en/web/operations/project/id/2000001181
		2210000	N/A	Unspecified foreign private sector partners	Private sector	2017	A	N/A	Rural Empowerment & Agriculture Development Scaling-up Initiative	https://www.ifad.org/en/web/operations/project/id/2000001181
	Indonesia other total	1.18094e+09	N/A	N/A	N/A	N/A	N/A	N/A	N/A	N/A
	INDONESIA TOTAL	1.28299e+09
MEXICO	Campeche	362421	N/A	UNDP-Norway	Bilateral	2018	A	Y	Project to support jurisdictional strategy & investment plan	https://www.gcftf.org/gcf-jurisdictional-strategy-updates
	Campeche total	362421	N/A	N/A	N/A	N/A	N/A	N/A	N/A	N/A
	Chiapas	351590	N/A	UNDP-Norway	Bilateral	2018	A	Y	Project to support jurisdictional strategy & investment plan	https://www.gcftf.org/gcf-jurisdictional-strategy-updates
	Chiapas total	351590	N/A	N/A	N/A	N/A	N/A	N/A	N/A	N/A
	Jalisco	359339	N/A	UNDP-Norway	Bilateral	2018	A	Y	Project to support jurisdictional strategy & investment plan	https://www.gcftf.org/gcf-jurisdictional-strategy-updates
	Jalisco total	359339	N/A	N/A	N/A	N/A	N/A	N/A	N/A	N/A
	Oaxaca	386882	N/A	UNDP-Norway	Bilateral	2018	A	Y	Project to support jurisdictional strategy & investment plan	https://www.gcftf.org/gcf-jurisdictional-strategy-updates
	Oaxaca total	386882	N/A	N/A	N/A	N/A	N/A	N/A	N/A	N/A
	Quintana Roo	371350	N/A	UNDP-Norway	Bilateral	2018	A	Y	Project to support jurisdictional strategy & investment plan	https://www.gcftf.org/gcf-jurisdictional-strategy-updates
	Quintana Roo total	371350	N/A	N/A	N/A	N/A	N/A	N/A	N/A	N/A
	Tabasco	199745	N/A	UNDP-Norway	Bilateral	2018	A	Y	Project to support jurisdictional strategy & investment plan	https://www.gcftf.org/gcf-jurisdictional-strategy-updates
	Tabasco total	199745	N/A	N/A	N/A	N/A	N/A	N/A	N/A	N/A
	Yucatan	377120	N/A	UNDP-Norway	Bilateral	2018	A	Y	Project to support jurisdictional strategy & investment plan	https://www.gcftf.org/gcf-jurisdictional-strategy-updates
	Yucatan total	377120	N/A	N/A	N/A	N/A	N/A	N/A	N/A	N/A
	Subtotal: Individual jurisdictions	2408447	N/A	N/A	N/A	N/A	N/A	N/A	N/A	N/A
	Mexico other	6.77461e+06	MXN 127,796,271 (x 0.053011)	FIP	Multilateral	2017	A	N/A	Emissions Reduction Initiative (IRE); structured at jurisdictional level through Investment Programs	https://www.forestcarbonpartnership.org/system/files/documents/__ENGLISH_6november_2017_Mx.pdf
		60000000	N/A	FIP	Multilateral	2011	B	N/A	FIP Investment Plan	https://www.climateinvestmentfunds.org/country/mexico
		6000000	N/A	World Bank (IBRD)	Multilateral	2017	A	N/A	SCF-FIP Grant: Dedicated Grant Mechanism for IP & LC	https://www.dgmglobal.org/mexico
		650000	N/A	FAO, UNDP, UNEP	Multilateral	2014	B	N/A	UN-REDD: Safeguards & multiple benefits	https://www.unredd.net/index.php?option=com_country&view=countries&id=49&Itemid=609
		150000	N/A	FAO	Multilateral	2015	A	N/A	UN-REDD: MRV & Monitoring	https://www.unredd.net/index.php?option=com_country&view=countries&id=49&Itemid=609
		15356000	N/A	Norway	Bilateral	2010	B	N/A	Norway-Mexico MOU	https://www.regjeringen.no/en/topics/climate-and-environment/climate/climate-and-forest-initiative/kos-innsikt/mexico1/id734162/
		25660000	N/A	World Bank (SCF-FIP)	Multilateral	2012	B	N/A	SCF-FIP Grant: Mexico Forests and Climate Change Project	http://documents.worldbank.org/curated/en/132941537212873195/pdf/ICR00004321-08282018.pdf
		16340000	N/A	World Bank (SCF-FIP)	Multilateral	2012	B	N/A	SCF-FIP Loan: Mexico Forests and Climate Change Project	http://documents.worldbank.org/curated/en/132941537212873195/pdf/ICR00004321-08282018.pdf
		350000000	N/A	World Bank (IBRD)	Multilateral	2012	B	N/A	IBRD Loan: Mexico Forests and Climate Change Project	http://documents.worldbank.org/curated/en/132941537212873195/pdf/ICR00004321-08282018.pdf
	Mexico other total	4.80931e+08	N/A	N/A	N/A	N/A	N/A	N/A	N/A	N/A
	MEXICO TOTAL	4.83339e+08
PERU	Amazonas	389996	N/A	UNDP-Norway	Bilateral	2018	A	Y	Project to support jurisdictional strategy & investment plan	https://www.gcftf.org/gcf-jurisdictional-strategy-updates
	Amazonas total	389996	N/A	N/A	N/A	N/A	N/A	N/A	N/A	N/A
	Huánuco	389889	N/A	UNDP-Norway	Bilateral	2018	A	Y	Project to support jurisdictional strategy & investment plan	https://www.gcftf.org/gcf-jurisdictional-strategy-updates
	Huánuco total	389889	N/A	N/A	N/A	N/A	N/A	N/A	N/A	N/A
	Loreto	399283	N/A	UNDP-Norway	Bilateral	2018	A	Y	Project to support jurisdictional strategy & investment plan	https://www.gcftf.org/gcf-jurisdictional-strategy-updates
		6240000	N/A	Green Climate Fund	Multilateral	2016	A	N	Building the Resilience of Wetlands in the Province of Datem del Marañón, Peru	https://www.greenclimate.fund/documents/20182/574760/Funding_proposal_-_FP001_-_Profonanpe_-_Peru.pdf/c2d588e6-882b-47f8-a06d-0645a9a3382c
		1800000	N/A	Korean government	Bilateral	2016	A	N	Building the Resilience of Wetlands in the Province of Datem del Marañón, Peru	https://www.greenclimate.fund/documents/20182/574760/Funding_proposal_-_FP001_-_Profonanpe_-_Peru.pdf/c2d588e6-882b-47f8-a06d-0645a9a3382c
	Loreto total	8439283	N/A	N/A	N/A	N/A	N/A	N/A	N/A	N/A
	Madre de Dios	200000	N/A	UNDP-Norway	Multilateral	2018	A	Y	Project to support jurisdictional strategy & investment plan	Personal communication with Gustavo Suárez de Freitas, EII Peru Program Coordinator
	Madre de Dios total	200000	N/A	N/A	N/A	N/A	N/A	N/A	N/A	N/A
	Piura	389140	N/A	UNDP-Norway	Bilateral	2018	A	Y	Project to support jurisdictional strategy & investment plan	https://www.gcftf.org/gcf-jurisdictional-strategy-updates
	Piura total	389140	N/A	N/A	N/A	N/A	N/A	N/A	N/A	N/A
	San Martín	389301	N/A	UNDP-Norway	Bilateral	2018	A	Y	Project to support jurisdictional strategy & investment plan	https://www.gcftf.org/gcf-jurisdictional-strategy-updates
		3.13972e+07	N/A	Pur Projet	Private sector	2010	B	N	Biocorredor Martin Sagrado REDD+ project	https://www.purprojet.com/project/biocorredor-martin-sagrado/
	San Martín total	3.17865e+07	N/A	N/A	N/A	N/A	N/A	N/A	N/A	N/A
	Ucayali	389996	N/A	UNDP-Norway	Bilateral	2018	A	Y	Project to support jurisdictional strategy & investment plan	https://www.gcftf.org/gcf-jurisdictional-strategy-updates
	Ucayali total	389996	N/A	N/A	N/A	N/A	N/A	N/A	N/A	N/A
	Subtotal: Individual jurisdictions	4.19848e+07	N/A	N/A	N/A	N/A	N/A	N/A	N/A	N/A
	Peru other	5500000	N/A	World Bank (FIP)	Multilateral	2015	A	N/A	Saweto Dedicated Grant Mechanism for Indigenous Peoples and Local Communities	https://www.dgmglobal.org/peru
		20000	N/A	UNDP	Multilateral	2016	A	N/A	"Preparando el camino para la plena implementación de la fase de 'transformación' de la Declaración Conjunta de Intención firmada por los Gobiernos de la República del Perú, Reino de Noruega, la República Federal de Alemania"	https://info.undp.org/docs/pdc/Documents/PER/Prodoc%20DCI%20Noruega%20firmado.pdf
		6135722	N/A	Norway	Bilateral	2016	A	N/A	"Preparando el camino para la plena implementación de la fase de 'transformación' de la Declaración Conjunta de Intención firmada por los Gobiernos de la República del Perú, Reino de Noruega, la República Federal de Alemania"	https://info.undp.org/docs/pdc/Documents/PER/Prodoc%20DCI%20Noruega%20firmado.pdf
		5652975	NOK 47,500,000 (x 0.119010)	WWF	NGO	2016	A	N/A	“Supporting implementation of the Peruvian-Norwegian-German Joint Declaration of Intent on REDD+”	http://www.bosques.gob.pe/archivo/23-apoyo-dci-wwf-pncb-norad.pdf
		76000000	N/A	SERFOR CAF	Multilateral	2015	A	N/A	Forest CAF	http://www.bosques.gob.pe/archivo/23-apoyo-dci-wwf-pncb-norad.pdf
		20000000	N/A	Japan	Bilateral	2016	A	N/A	JICA program: forest monitoring, sustainable forest management & conservation	http://www.bosques.gob.pe/archivo/23-apoyo-dci-wwf-pncb-norad.pdf
		50000000	N/A	FIP	Multilateral	2017	A	N/A	Forest Investment Plan	https://www.climateinvestmentfunds.org/sites/cif_enc/files/fip_sc.11_4_peru_ip_.pdf
		6.62538e+06	EUR 4,987,000 (x 1.328530)	GIZ	Bilateral	2014	B	N/A	Peru Tropical Forest Program (CBC II)	https://www.international-climate-initiative.com/en/nc/details/project/compensatory-payments-for-the-protection-of-indigenous-community-forests-within-the-context-of-perus-tropical-forest-programme-cbc-ii-13_IV%2B_037-381/
		300000000	NOK 6 / 1 USD	Norway	Bilateral	2014	B	N/A	Peru-Norway-Germany DCI	https://www.regjeringen.no/contentassets/b324ccc0cf88419fab88f2f4c7101f20/declarationofintentperu.pdf
		20000000	N/A	Germany	Bilateral	2014	B	N/A	Peru-Norway-Germany DCI	https://www.cgdev.org/sites/default/files/peru-participation-redd-perception-impacts-indigenous-communities.pdf
		4065780	N/A	UN-REDD/UNDP	Multilateral	2017	A	N/A	National UN-REDD program - complementing national govt efforts for implementation of REDD+, ENBCC, NDC compliance	https://www.unredd.net/documents/un-redd-partner-countries-181/latin-america-the-caribbean-334/peru-328/16517-un-redd-peru-national-programme-document.html
		40000000	N/A	IBD	Multilateral	2014	B	N/A	Rural Land Titling & Registration Project in Peru - Third Phase (PTRT-3)	http://idbdocs.iadb.org/wsdocs/getdocument.aspx?docnum=EZSHARE-1831006187-2
		4245752	N/A	GEF	Multilateral	2017	A	N/A	Paisajes Productivos Sostenibles	https://www.pe.undp.org/content/peru/es/home/projects/paisajes-productivos-sostenibles.html
	Peru other total	5.38246e+08				N/A		N/A
	PERU TOTAL	5.8023e+08

## Sheet: Table S4b
Table S4b. Database of international finance to 30 subnational government signatories to the Rio Branco Declaration from 2010-2018: Sums; other calculations
		Pre-RBD	Post-RBD	Total		Finance pledged in direct response to RBD (UNDP-Norway)	Percent UNDP-Norway of total	Direct results-based finance	Current progress to RBD
BR	AC	1.54771e+08	3.73521e+07	1.92123e+08		388250	0.00202084	6.68077e+07	0.29
	AP	608295	2898401	3.5067e+06		398401	0.113612	0	0.31
	AM	2.12847e+07	2.63716e+07	4.76563e+07		372425	0.00781482	0	-0.43
	MA	2.36375e+06	1.25916e+07	1.49553e+07		400000	0.0267463	0	0.89
	MT	22403676	7.32251e+07	9.56288e+07		399488	0.00417749	5.08929e+07	0.93
	PA	4.14411e+07	7.8387e+06	4.92798e+07		400000	0.00811691	0	0.67
	RO	2.48454e+07	1.03399e+07	3.51853e+07		365109	0.0103768	0	0.52
	RR	0	1.63806e+06	1.63806e+06		400000	0.244192	0	0.39
	TO	1.59364e+07	372120	1.63085e+07		372120	0.0228175	0	1.04
	Total	2.83654e+08	1.72627e+08	4.56282e+08		3.49579e+06	0.00766148	1.17701e+08
	Mean	3.15172e+07	1.91808e+07	5.0698e+07		388421		1.30778e+07
	Median	2.12847e+07	1.03399e+07	3.51853e+07		398401		0
IN	AH	0	7.59095e+06	7.59095e+06		399962	0.0526893	0	0.15
	CK	0	2342483	2342483		319313	0.136314	0	0.12
	EK	0	91025000	91025000		325000	0.00357045	0	-0.22
	NK	0	299841	299841		299841	1	0	-0.36
	PP	0	350000	350000		350000	1	0	0.82
	WK	0	399786	399786		399786	1	0	-0.03
	WP	0	337219	337219		337219	1	0	-5.6
	Total	0	1.02345e+08	1.02345e+08		2431121	0.0237541	0
	Mean	0	1.46208e+07	1.46208e+07		347303		0
	Median	0	399786	399786		337219		0
MX	CM	0	362421	362421		362421	1	0	-0.45
	CS	0	351590	351590		351590	1	0	-0.22
	JA	0	359339	359339		359339	1	0	-0.09
	OA	0	386882	386882		386882	1	0	-0.03
	QR	0	371350	371350		371350	1	0	-1.05
	TB	0	199745	199745		199745	1	0	-2.88
	YU	0	377120	377120		377120	1	0	-0.64
	Total	0	2408447	2408447		2408447	1	0
	Mean	0	344064	344064		344064		0
	Median	0	362421	362421		362421		0
PE	AZ	0	389996	389996		389996	1	0	-0.67
	HU	0	389889	389889		389889	1	0	0.37
	LO	0	8439283	8439283		399283	0.0473124	0	0.27
	MD	0	200000	200000		200000	1	0	-0.83
	PI	0	389140	389140		389140	1	0	-1.28
	SM	3.13972e+07	389301	3.17865e+07		389301	0.0122474	0	0.5
	UC	0	389996	389996		389996	1	0	0.12
	Total	3.13972e+07	10587605	4.19848e+07		2547605	0.0606792	0
	Mean	4.48531e+06	1512515	5.99783e+06		363944		0
	Median	0	389889	389996		389889		0
Grand total		3.15052e+08	2.87969e+08	6.0302e+08		1.0883e+07		1.17701e+08
Mean		1.05017e+07	9.59896e+06	2.01007e+07		363915		3.92335e+06
Median		0	389942	394891		382001		0

[truncated: 2 more sheets: Table S5, Figure S1]
